# Supplementary material for: Comprehensive analysis of the clinical significance and molecular mechanism of T-box transcription factor 3 in osteosarcoma
Source: PubMed Central journal article supplement (PMC11190752; doi:10.7150/jca.96168), 2024-05-30
Supplement: jcav15p4007s1.pdf [file jcav15p4007s1.pdf]

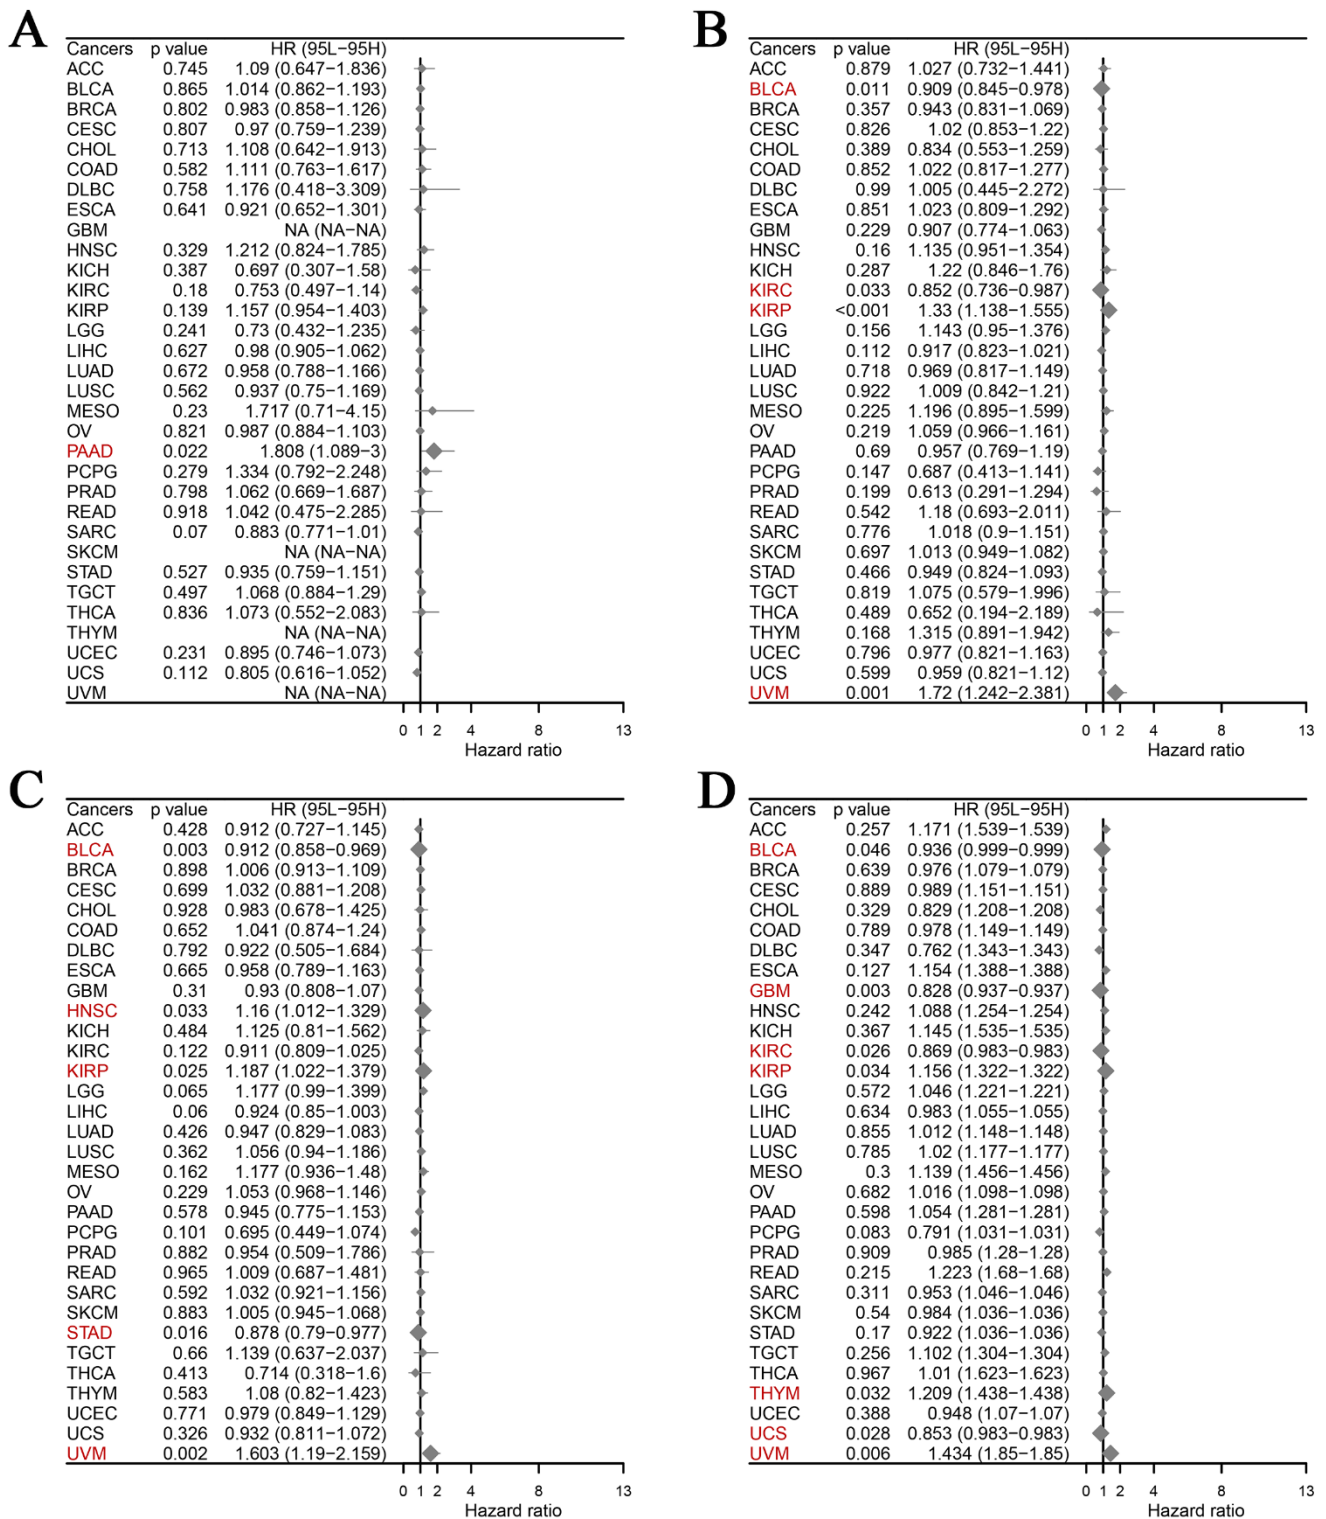

**Additional Fig. S1.** (A) Relation of TBX3 expression with disease-free interval of 32 types tumors patients. (B) Relation of TBX3 expression with disease-specific survival of 32 types tumors patients. (C) Relation of TBX3 expression with overall survival of 32 types tumors patients. (D) Relation of TBX3 expression with progression-free interval of 32 types tumors patients.

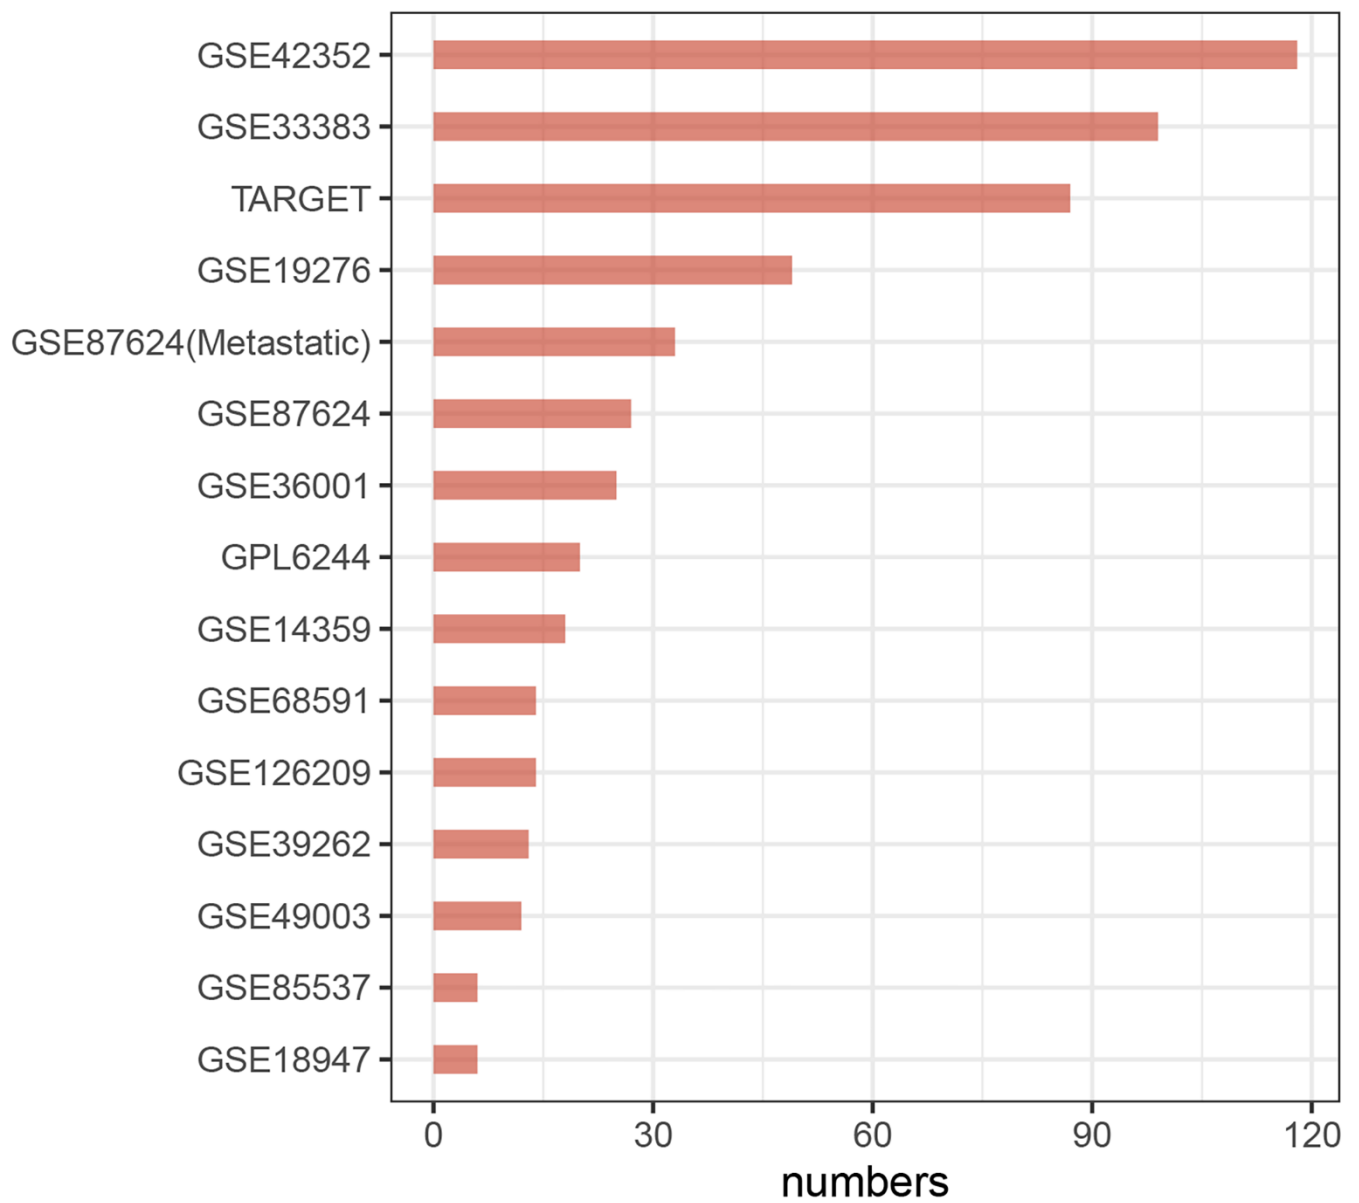

**Additional Fig. S2. Datasets included in the study and their sample numbers.**

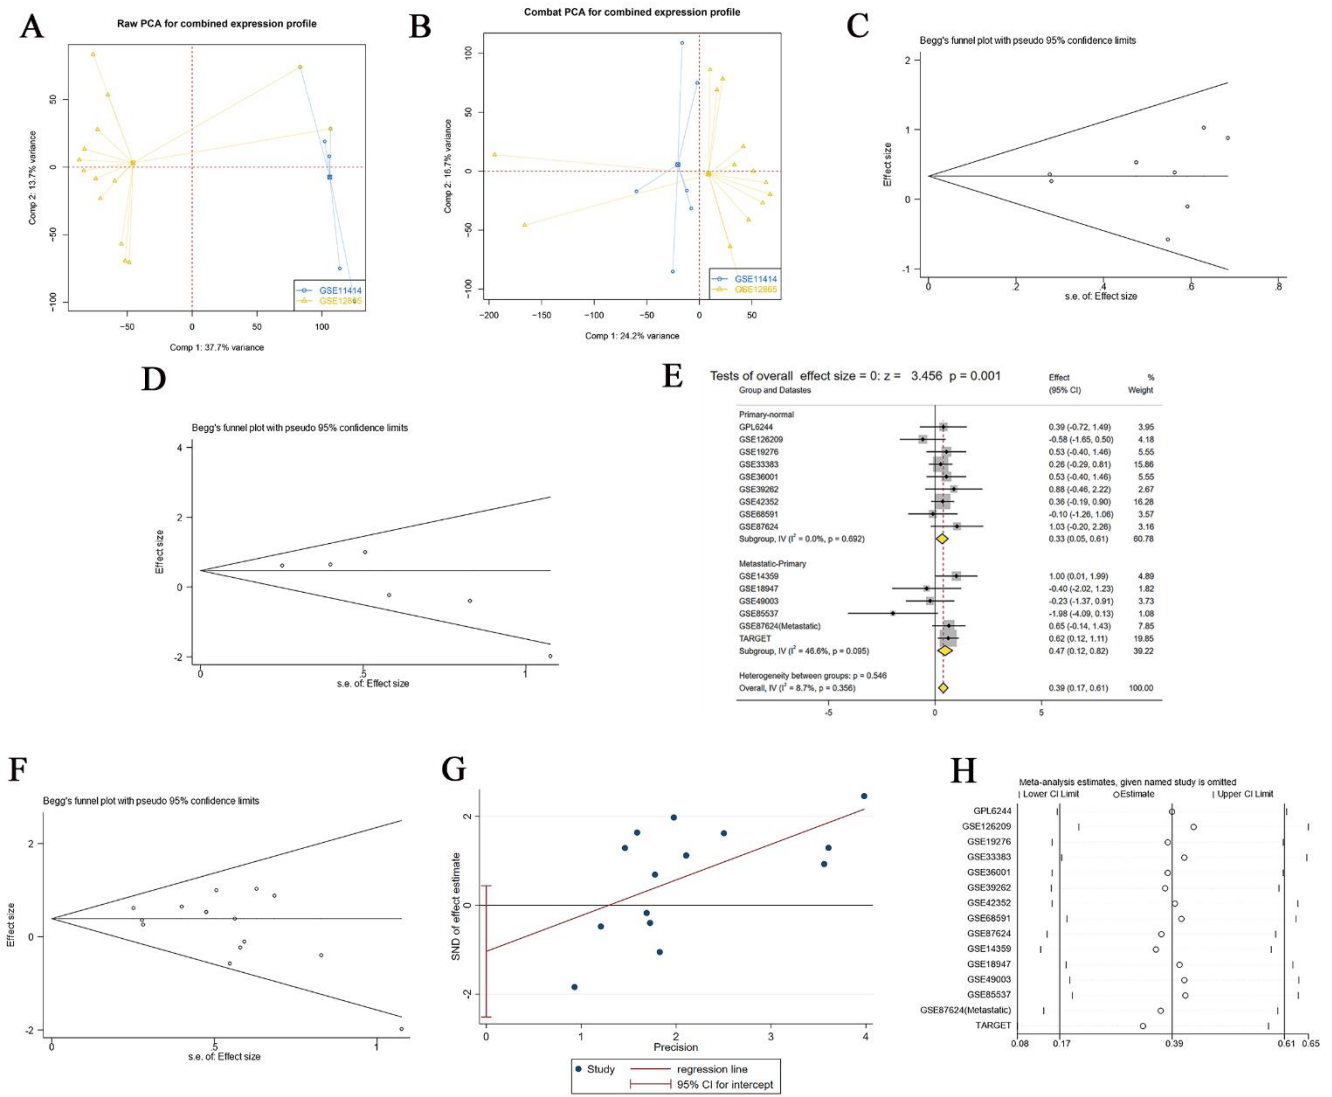

**Additional Fig. S3.** (A) PCA dimensionality reduction before datasets merging (GSE11414 and GSE12865). (B) PCA dimensionality reduction after datasets merging (GSE11414 and GSE12865). (C) Begg's test showing no publication bias in the analysis of integrating primary OS samples ( $p=0.602$ ). (D) Begg's test showing no publication bias in the analysis of integrating metastatic OS samples ( $p=0.133$ ). (E) Forest diagram of TBX3 mRNA expression in overall OS samples and normal control samples, prompting for high expression. (F) Begg's test showing no publication bias in the analysis of integrating overall OS samples ( $p=0.198$ ). (G) Egger's test showing no publication bias in the analysis of integrating overall OS samples ( $p=0.153$ ). (H) Sensitivity analysis of integration results.

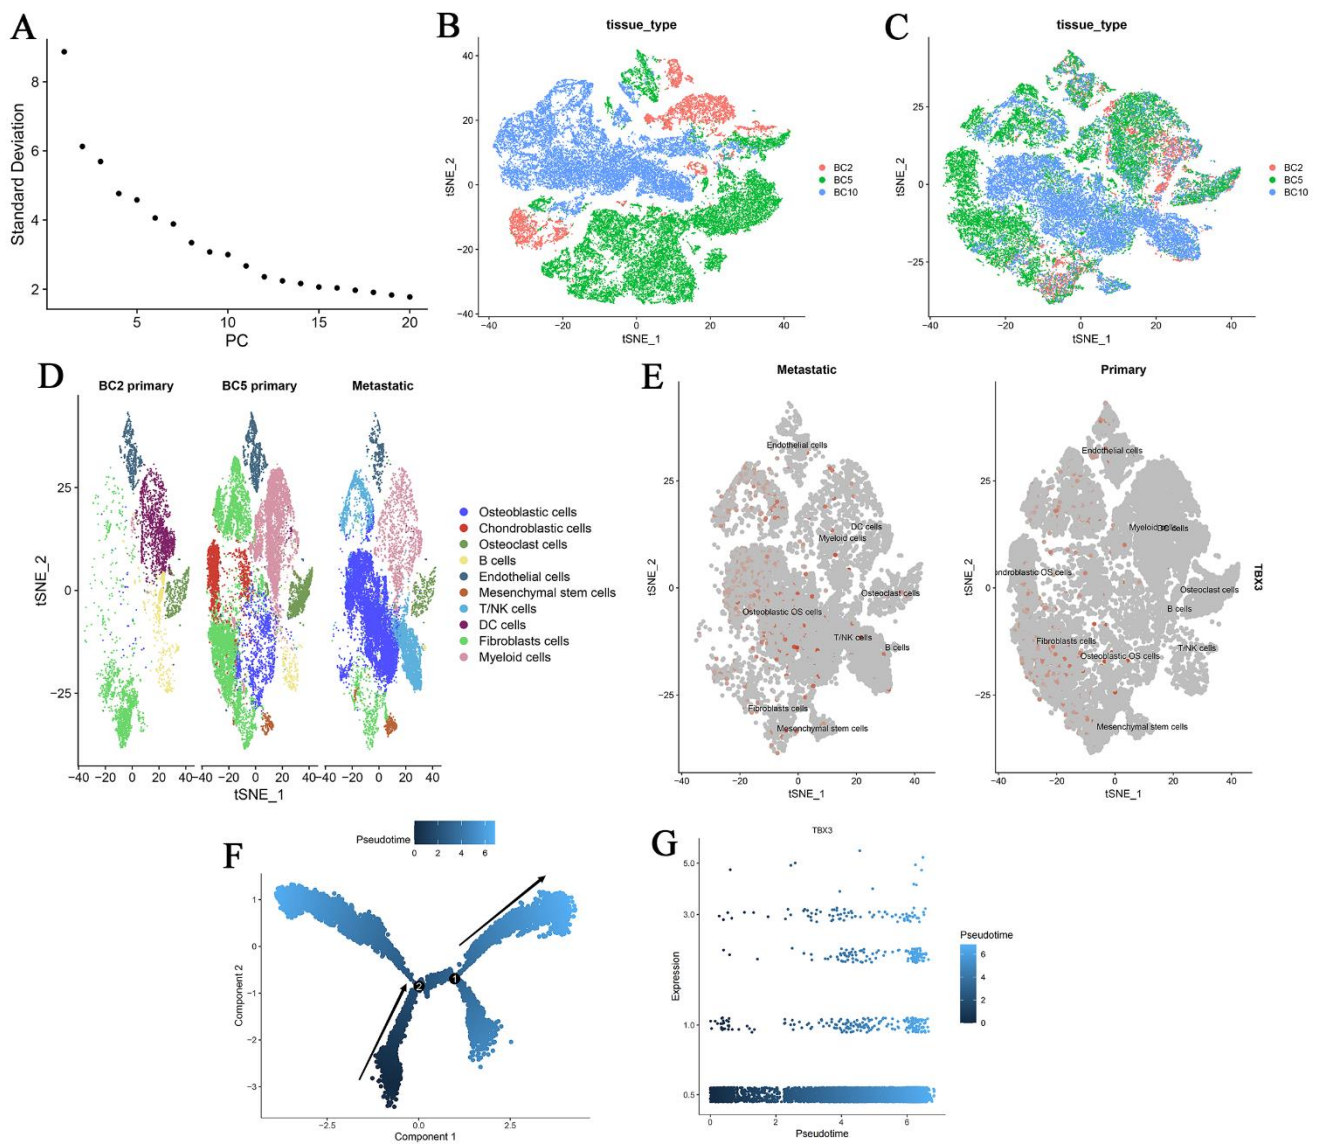

**Additional Fig. S4.** (A) Elbow plot for latitude selection. (B) Different cell types of OS microenvironment before using R package “harmony” to merge samples. (C) Different cell types of OS microenvironment after using R package “harmony” to merge samples. (D). Different cell types of OS microenvironment based on the different tissue. (E) TBX3’s expression is more elevated in osteoblastic osteosarcoma cells in metastatic samples compared to primary samples. (F) Construction of cell trajectories of TBX3 in osteoblastic OS cells subpopulations based on metastatic samples. (G) As the pseudotime extended, the expression level of TBX3 showed an increasing tendency. TBX3, T-box transcription factor 3; OS, osteosarcoma.

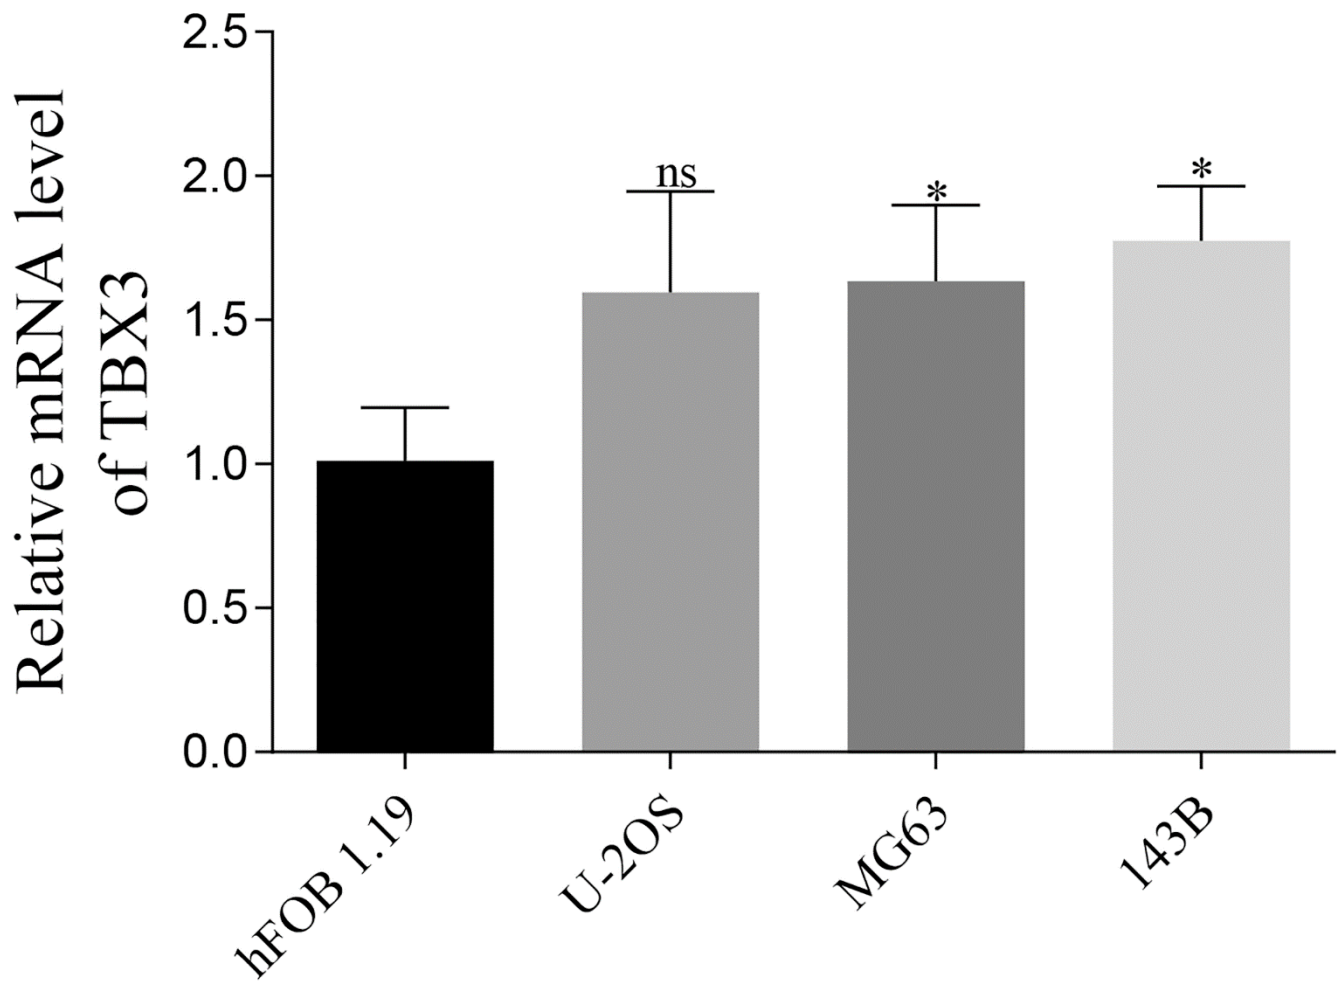

**Additional Fig. S5.** TBX3 mRNA expression in human OS cell lines (MG63 and 143B) was significantly higher than that in human osteoblast cells (hFOB1.19), but not significantly in U-2OS cells.

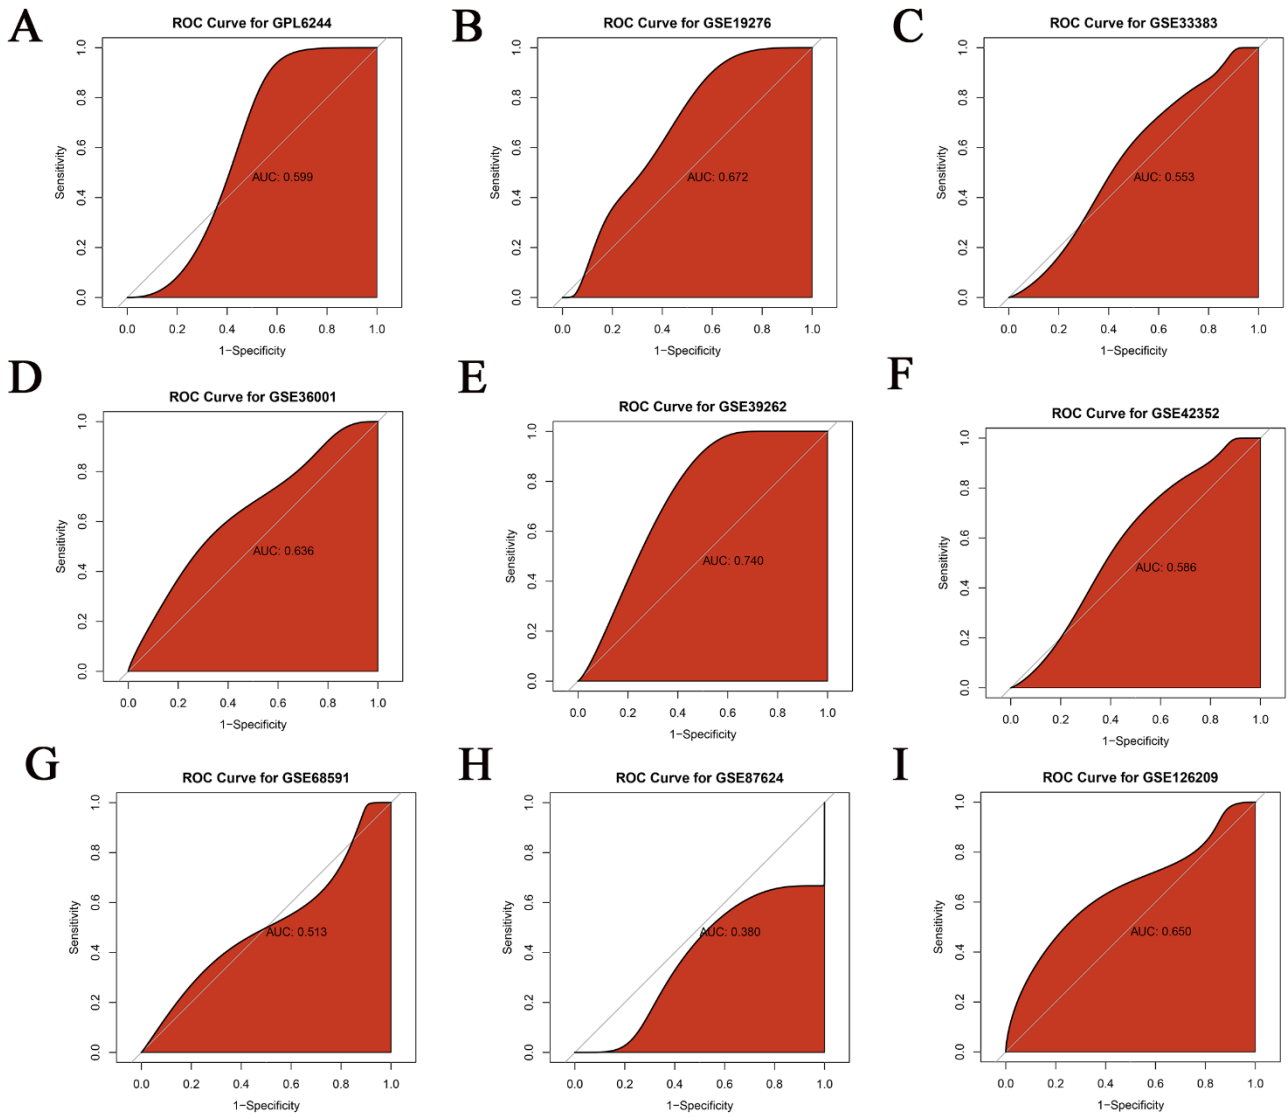

**Additional Fig. S6. ROC curves of TBX3 in GEO datasets of primary OS samples.**



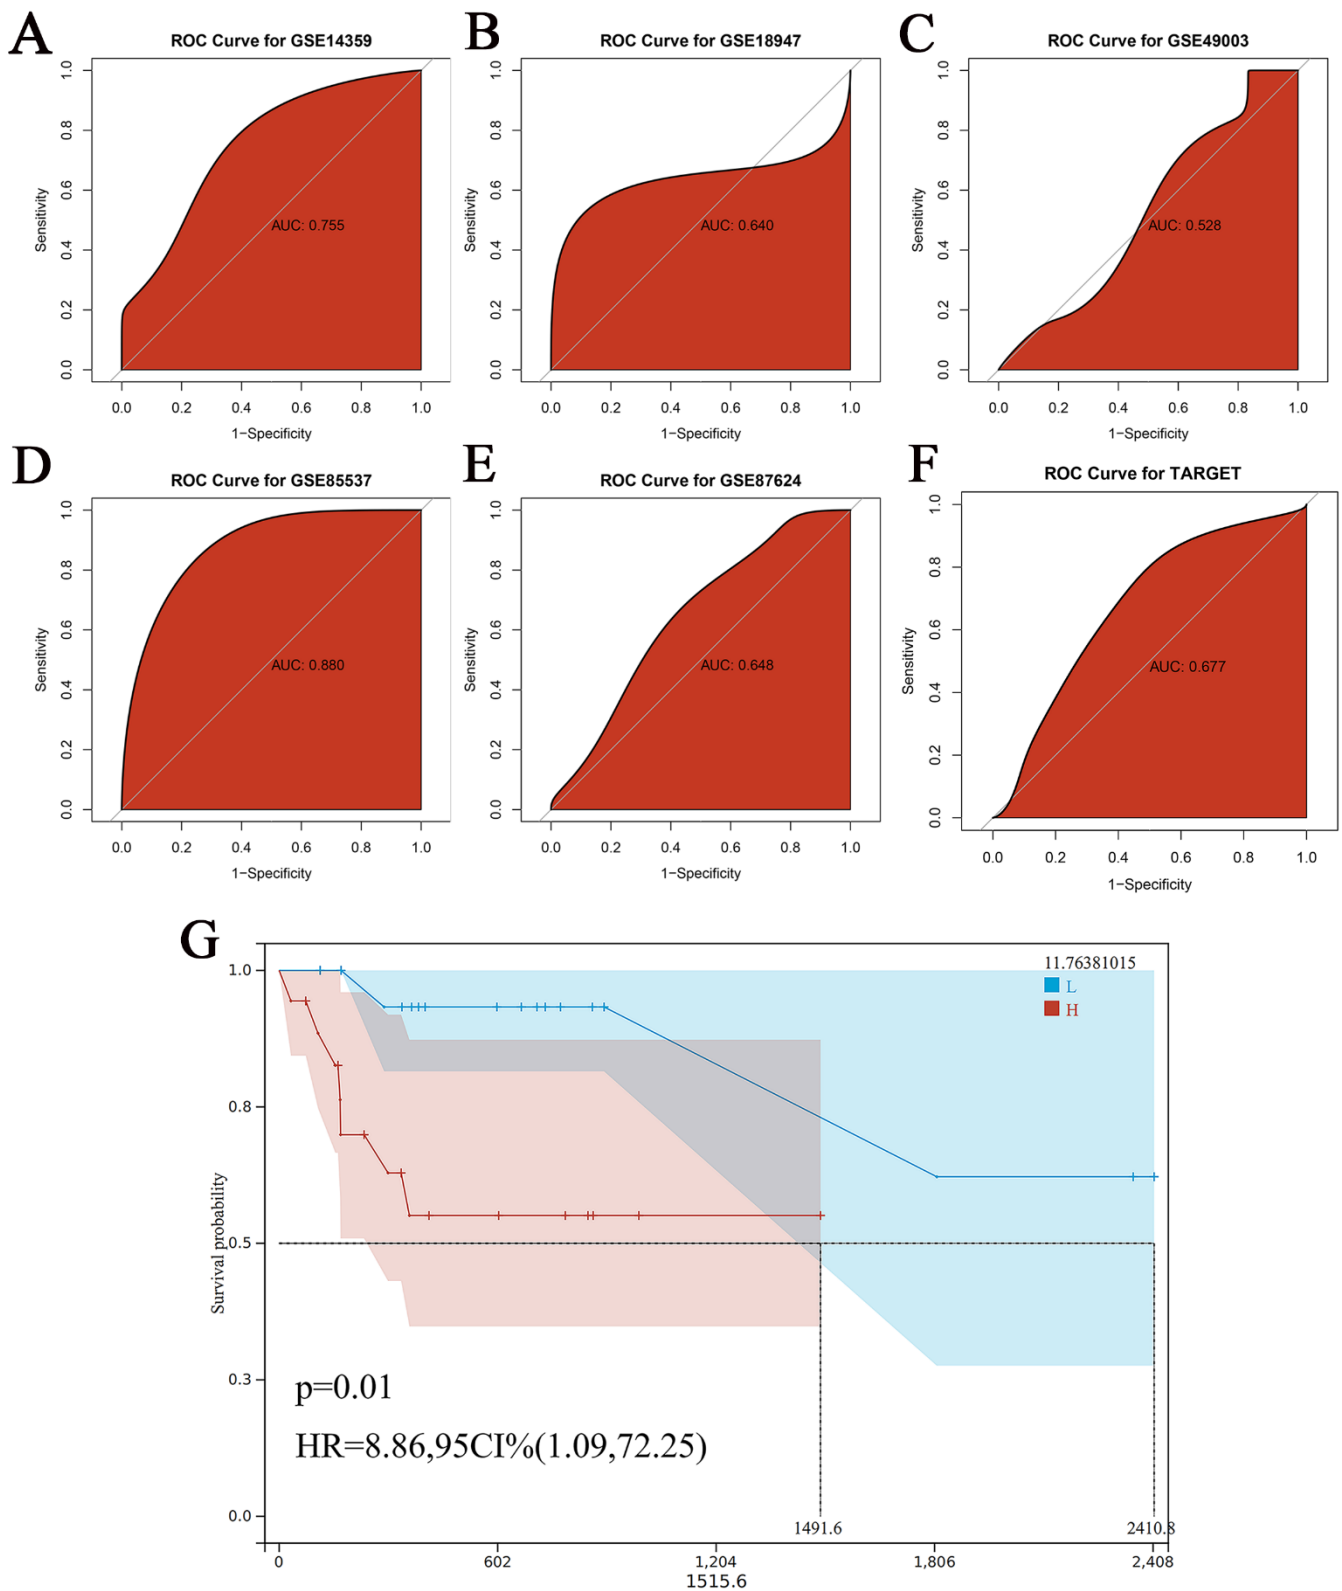

**Additional Fig. S7.** (A-F) ROC curves of TBX3 in GEO datasets of metastatic OS samples. (G) TBX3 high expression was related to shorter survival time of OS patients.

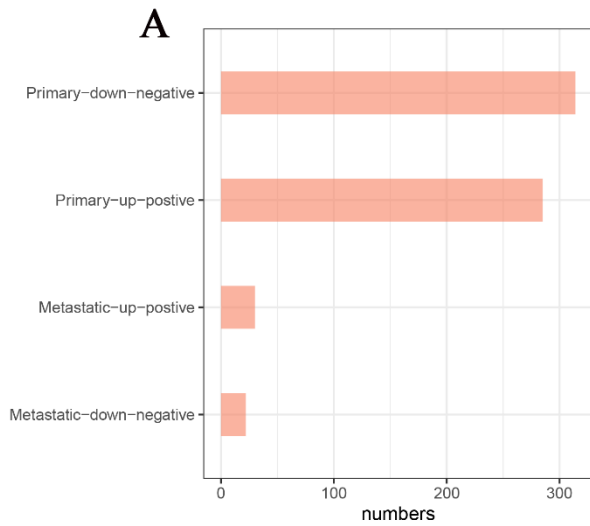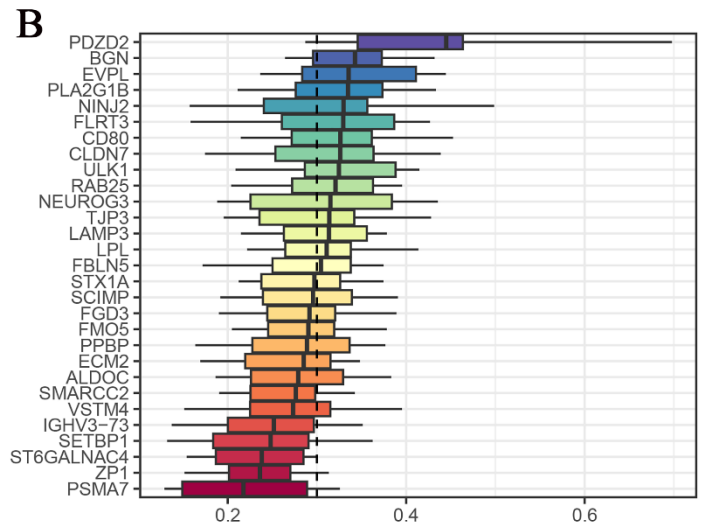

**Additional Fig. S8.** (A) Genes closely linked to TBX3 in primary and metastatic OS samples. (B) GO friend analysis revealed that PDZD2 got the highest score.



## Supplementary table1. The detailed clinic parameters along with the TBX3 expression status in 517 samples

| Samples   | TBX3 expression status | Platform | Source                                                               |
|-----------|------------------------|----------|----------------------------------------------------------------------|
| GSM288005 | 7.2392                 | GPL6244  | normal human osteoblasts                                             |
| GSM288006 | 7.25706                | GPL6244  | normal human osteoblasts                                             |
| GSM322691 | 6.64905                | GPL6244  | osteosarcoma tumor 177                                               |
| GSM322692 | 6.79037                | GPL6244  | osteosarcoma tumor 177                                               |
| GSM322693 | 6.08054                | GPL6244  | osteosarcoma tumor 178                                               |
| GSM322694 | 6.35785                | GPL6244  | osteosarcoma tumor 178                                               |
| GSM322695 | 8.34348                | GPL6244  | osteosarcoma tumor 179                                               |
| GSM322696 | 8.35211                | GPL6244  | osteosarcoma tumor 179                                               |
| GSM322697 | 7.60309                | GPL6244  | osteosarcoma tumor 180                                               |
| GSM322698 | 7.68539                | GPL6244  | osteosarcoma tumor 180                                               |
| GSM322699 | 6.53589                | GPL6244  | osteosarcoma tumor 182                                               |
| GSM322700 | 6.8786                 | GPL6244  | osteosarcoma tumor 182                                               |
| GSM322701 | 8.33629                | GPL6244  | osteosarcoma tumor 183                                               |
| GSM322702 | 8.48162                | GPL6244  | osteosarcoma tumor 183                                               |
| GSM288005 | 7.2392                 | GPL6244  | normal human osteoblasts                                             |
| GSM288006 | 7.25706                | GPL6244  | normal human osteoblasts                                             |
| GSM288007 | 7.32452                | GPL6244  | OS cell line 1                                                       |
| GSM288008 | 7.34544                | GPL6244  | OS cell line 1                                                       |
| GSM288009 | 7.92875                | GPL6244  | OS cell line 2                                                       |
| GSM288010 | 7.95555                | GPL6244  | OS cell line 2                                                       |
| GSM359139 | 11.15462827            | GPL96    | conventional osteosarcoma tissue, female, 15 years, femur, grade 3   |
| GSM359140 | 11.48824184            | GPL96    | conventional osteosarcoma tissue, female, 15 years, femur, grade 3   |
| GSM359141 | 10.72766524            | GPL96    | osteosarcoma lung metastasis tissue, female, 45 years, lung, grade 1 |
| GSM359142 | 9.844705764            | GPL96    | osteosarcoma lung metastasis tissue, female, 45 years, lung, grade 1 |
| GSM359143 | 10.65731845            | GPL96    | conventional osteosarcoma tissue, female, 74 years, femur, grade 2   |
| GSM359144 | 10.35887094            | GPL96    | conventional osteosarcoma tissue, female, 74 years, femur, grade 2   |
| GSM359145 | 11.20756347            | GPL96    | osteosarcoma lung metastasis tissue, female, 37 years, lung, grade 2 |
| GSM359146 | 11.08061769            | GPL96    | osteosarcoma lung metastasis tissue, female, 37 years, lung, grade 2 |
| GSM359147 | 10.06622376            | GPL96    | conventional osteosarcoma tissue, male, 7 years, femur, grade 2      |
| GSM359148 | 10.60269887            | GPL96    | conventional osteosarcoma tissue, male, 7 years, femur, grade 2      |
| GSM359149 | 10.58327085            | GPL96    | conventional osteosarcoma tissue, male, 17 years, femur, grade 3     |
| GSM359150 | 9.8166637              | GPL96    | conventional osteosarcoma tissue, male, 17 years, femur, grade 3     |
| GSM359151 | 10.70649602            | GPL96    | osteosarcoma lung metastasis tissue, male, 40 years, lung, grade 3   |
| GSM359152 | 10.66790986            | GPL96    | osteosarcoma lung metastasis tissue, male, 40 years, lung, grade 3   |
| GSM359153 | 11.01164658            | GPL96    | osteosarcoma lung metastasis tissue, female, 21 years, lung, grade 3 |
| GSM359154 | 10.79701298            | GPL96    | osteosarcoma lung metastasis tissue, female, 21 years, lung, grade 3 |
| GSM359155 | 10.325193              | GPL96    | conventional osteosarcoma tissue, male, 23 years, tibia, grade 3     |
| GSM359156 | 10.89504506            | GPL96    | conventional osteosarcoma tissue, male, 23 years, tibia, grade 3     |
| GSM469260 | 6.575917361            | GPL570   | low metastatic potential cell subline of Sosp-9607, biological rep1  |
| GSM469261 | 5.970393538            | GPL570   | low metastatic potential cell subline of Sosp-9607, biological rep2  |
| GSM469262 | 5.371558863            | GPL570   | high metastatic potential cell subline of Sosp-9607, biological rep1 |
| GSM469263 | 5.213347282            | GPL570   | high metastatic potential cell subline of Sosp-9607, biological rep2 |
| GSM469264 | 3.867896464            | GPL570   | low metastatic potential cell subline of Saos-2                      |

|           |              |         |                                                  |
|-----------|--------------|---------|--------------------------------------------------|
| GSM469265 | 4.584962501  | GPL570  | high metastatic potential cell subline of Saos-2 |
| GSM481071 | 0.659870635  | GPL6848 | Femaleleft tibia 76 years                        |
| GSM481072 | -0.075334075 | GPL6848 | Femaleleft tibia 76 years                        |
| GSM481073 | 0.131947515  | GPL6848 | Maleleft pelvis 39 years                         |
| GSM481074 | 0.53060961   | GPL6848 | Maleleft pelvis 39 years                         |
| GSM481075 | 0.372122285  | GPL6848 | Femaleright femur19 years                        |
| GSM481076 | 0.051123855  | GPL6848 | Femaleright femur19 years                        |
| GSM481077 | 0.065560815  | GPL6848 | Male right femur14 years                         |
| GSM481078 | -0.143960713 | GPL6848 | Male right femur14 years                         |
| GSM481079 | 0.18720674   | GPL6848 | Male left femur12 years                          |
| GSM481080 | -0.15529299  | GPL6848 | Male left femur12 years                          |
| GSM481081 | -0.08783675  | GPL6848 | Female right humerus15 years                     |
| GSM481082 | 0.157060145  | GPL6848 | Female right humerus15 years                     |
| GSM481083 | -0.23142765  | GPL6848 | Female right humerus27 years                     |
| GSM481084 | -0.46128845  | GPL6848 | Female right tibia37 years                       |
| GSM481085 | -0.291349425 | GPL6848 | Female right tibia37 years                       |
| GSM481086 | -0.610448835 | GPL6848 | Female right femur13 years                       |
| GSM481087 | -0.8345151   | GPL6848 | Female right femur13 years                       |
| GSM481088 | 0.438986315  | GPL6848 | Female tibia7 years                              |
| GSM481089 | -0.111478335 | GPL6848 | Female tibia7 years                              |
| GSM481090 | -0.68950318  | GPL6848 | Female sacrum 29 years                           |
| GSM481091 | -0.531173235 | GPL6848 | Female sacrum 29 years                           |
| GSM481092 | 0.062672614  | GPL6848 | Male right tibia15 years                         |
| GSM481093 | 1.3186114    | GPL6848 | Male right tibia15 years                         |
| GSM481094 | 0.283712389  | GPL6848 | Female right femur 15 years                      |
| GSM481095 | 0.533736705  | GPL6848 | Female right femur 15 years                      |
| GSM481096 | 0.5779624    | GPL6848 | Male left tibia 18 years                         |
| GSM481097 | 0.182408335  | GPL6848 | Male left tibia 18 years                         |
| GSM481098 | 0.4605074    | GPL6848 | Male right femur 18 years                        |
| GSM481099 | 0.61184002   | GPL6848 | Male right femur 18 years                        |
| GSM481100 | 0.546012865  | GPL6848 | Maleleft tibia17 years                           |
| GSM481101 | 0.161092515  | GPL6848 | Maleleft tibia17 years                           |
| GSM481102 | -1.1785841   | GPL6848 | Female left femur 14 years                       |
| GSM481103 | -0.77316331  | GPL6848 | Female left femur 14 years                       |
| GSM481104 | 0.46350908   | GPL6848 | Female left femur 24 years                       |
| GSM481105 | 0.43017245   | GPL6848 | Female left femur 24 years                       |
| GSM481106 | -0.233511449 | GPL6848 | Male left tibia 17 years                         |
| GSM481107 | -0.1928854   | GPL6848 | Male right pelvis 67 years                       |
| GSM481108 | 0.288132658  | GPL6848 | Male right pelvis 67 years                       |
| GSM481109 | -0.006337165 | GPL6848 | Male right 8th rib 18 years                      |
| GSM481110 | -0.261027095 | GPL6848 | Male right 8th rib 18 years                      |
| GSM481111 | 0.26095676   | GPL6848 | Male left femur 15 years                         |
| GSM481112 | 0.33114934   | GPL6848 | Male left femur 15 years                         |
| GSM481113 | -1.283824915 | GPL6848 | Male left calcaneum 16 years                     |
| GSM481114 | -0.55947781  | GPL6848 | Male left calcaneum 16 years                     |
| GSM481115 | -0.120723725 | GPL6848 | Female 49 years                                  |

|           |              |          |                                                          |
|-----------|--------------|----------|----------------------------------------------------------|
| GSM481116 | 0.08402205   | GPL6848  | Female femur head 75 years                               |
| GSM481117 | -0.592035317 | GPL6848  | Male 71 years                                            |
| GSM481118 | 0.01032257   | GPL6848  | Male 56 years                                            |
| GSM481119 | -0.67908096  | GPL6848  | Male 79 years                                            |
| GSM717846 | 7.725149434  | GPL10295 | 220-Msc                                                  |
| GSM717847 | 7.581945571  | GPL10295 | 240-Msc                                                  |
| GSM717848 | 7.70788472   | GPL10295 | Kaat-Msc                                                 |
| GSM717849 | 7.582494941  | GPL10295 | MSC_001_OS                                               |
| GSM717850 | 7.610370658  | GPL10295 | MSC_002_OS                                               |
| GSM717851 | 7.499490509  | GPL10295 | MSC_003_OS_2                                             |
| GSM717852 | 7.475565305  | GPL10295 | MSC_006_OS                                               |
| GSM717853 | 7.557016603  | GPL10295 | MSC_009_OS                                               |
| GSM717854 | 7.56583806   | GPL10295 | MSC_HD3                                                  |
| GSM717855 | 7.643666737  | GPL10295 | MSC_HD5                                                  |
| GSM717856 | 7.581932934  | GPL10295 | MSC_MH                                                   |
| GSM717857 | 7.569726137  | GPL10295 | MSC_TD_001                                               |
| GSM825623 | 8.035499018  | GPL10295 | Osteoblast 220-OB                                        |
| GSM825624 | 7.895234483  | GPL10295 | Osteoblast 240-OB                                        |
| GSM825625 | 7.754401898  | GPL10295 | Osteoblast Kaat-OB                                       |
| GSM825626 | 7.983967697  | GPL10295 | High-grade osteosarcoma pre-chemotherapy biopsy L428int  |
| GSM825627 | 7.704090315  | GPL10295 | High-grade osteosarcoma pre-chemotherapy biopsy L432int  |
| GSM825628 | 7.51312935   | GPL10295 | High-grade osteosarcoma pre-chemotherapy biopsy L436int  |
| GSM825629 | 8.107275821  | GPL10295 | High-grade osteosarcoma pre-chemotherapy biopsy L975int  |
| GSM825630 | 7.670882398  | GPL10295 | High-grade osteosarcoma pre-chemotherapy biopsy L997int  |
| GSM825631 | 7.553985172  | GPL10295 | High-grade osteosarcoma pre-chemotherapy biopsy L1016int |
| GSM825632 | 7.574400577  | GPL10295 | High-grade osteosarcoma pre-chemotherapy biopsy L1085int |
| GSM825633 | 7.661105847  | GPL10295 | High-grade osteosarcoma pre-chemotherapy biopsy L1368int |
| GSM825634 | 7.688257221  | GPL10295 | High-grade osteosarcoma pre-chemotherapy biopsy L1369int |
| GSM825635 | 7.496317287  | GPL10295 | High-grade osteosarcoma pre-chemotherapy biopsy L1370int |
| GSM825636 | 7.673973769  | GPL10295 | High-grade osteosarcoma pre-chemotherapy biopsy L1372int |
| GSM825637 | 7.797207625  | GPL10295 | High-grade osteosarcoma pre-chemotherapy biopsy L1376int |
| GSM825638 | 7.770380208  | GPL10295 | High-grade osteosarcoma pre-chemotherapy biopsy L1378int |
| GSM825639 | 7.640796799  | GPL10295 | High-grade osteosarcoma pre-chemotherapy biopsy L1382int |
| GSM825640 | 7.543910411  | GPL10295 | High-grade osteosarcoma pre-chemotherapy biopsy L1385int |
| GSM825641 | 7.821689727  | GPL10295 | High-grade osteosarcoma pre-chemotherapy biopsy L1386int |
| GSM825642 | 7.636564422  | GPL10295 | High-grade osteosarcoma pre-chemotherapy biopsy L2068int |
| GSM825643 | 7.727378325  | GPL10295 | High-grade osteosarcoma pre-chemotherapy biopsy L2178int |
| GSM825644 | 7.728246934  | GPL10295 | High-grade osteosarcoma pre-chemotherapy biopsy L2292int |
| GSM825645 | 7.444334435  | GPL10295 | High-grade osteosarcoma pre-chemotherapy biopsy L2295int |
| GSM825646 | 7.452363696  | GPL10295 | High-grade osteosarcoma pre-chemotherapy biopsy L2296int |
| GSM825647 | 7.776465692  | GPL10295 | High-grade osteosarcoma pre-chemotherapy biopsy L2297int |
| GSM825648 | 7.497378261  | GPL10295 | High-grade osteosarcoma pre-chemotherapy biopsy L2301int |
| GSM825649 | 7.646537053  | GPL10295 | High-grade osteosarcoma pre-chemotherapy biopsy L2302int |
| GSM825650 | 7.435562819  | GPL10295 | High-grade osteosarcoma pre-chemotherapy biopsy L2347int |
| GSM825651 | 7.709310064  | GPL10295 | High-grade osteosarcoma pre-chemotherapy biopsy L2376int |
| GSM825652 | 7.481747729  | GPL10295 | High-grade osteosarcoma pre-chemotherapy biopsy L2611int |

|           |             |          |                                                          |
|-----------|-------------|----------|----------------------------------------------------------|
| GSM825653 | 7.749049819 | GPL10295 | High-grade osteosarcoma pre-chemotherapy biopsy L2613int |
| GSM825654 | 7.436044038 | GPL10295 | High-grade osteosarcoma pre-chemotherapy biopsy L2614int |
| GSM825655 | 7.51551564  | GPL10295 | High-grade osteosarcoma pre-chemotherapy biopsy L2615int |
| GSM825656 | 7.474996    | GPL10295 | High-grade osteosarcoma pre-chemotherapy biopsy L2616int |
| GSM825657 | 7.755150022 | GPL10295 | High-grade osteosarcoma pre-chemotherapy biopsy L2617int |
| GSM825658 | 8.290514365 | GPL10295 | High-grade osteosarcoma pre-chemotherapy biopsy L2618int |
| GSM825659 | 7.651782812 | GPL10295 | High-grade osteosarcoma pre-chemotherapy biopsy L2619int |
| GSM825660 | 7.75385913  | GPL10295 | High-grade osteosarcoma pre-chemotherapy biopsy L2620int |
| GSM825661 | 7.452542567 | GPL10295 | High-grade osteosarcoma pre-chemotherapy biopsy L3431int |
| GSM825662 | 7.571275516 | GPL10295 | High-grade osteosarcoma pre-chemotherapy biopsy L3432int |
| GSM825663 | 8.04425807  | GPL10295 | High-grade osteosarcoma pre-chemotherapy biopsy L3433int |
| GSM825664 | 7.593152519 | GPL10295 | High-grade osteosarcoma pre-chemotherapy biopsy L3434int |
| GSM825665 | 7.653432401 | GPL10295 | High-grade osteosarcoma pre-chemotherapy biopsy L3435int |
| GSM825666 | 7.553208301 | GPL10295 | High-grade osteosarcoma pre-chemotherapy biopsy L3436int |
| GSM825667 | 7.639727004 | GPL10295 | High-grade osteosarcoma pre-chemotherapy biopsy L3437int |
| GSM825668 | 7.546437303 | GPL10295 | High-grade osteosarcoma pre-chemotherapy biopsy L3438int |
| GSM825669 | 7.596407796 | GPL10295 | High-grade osteosarcoma pre-chemotherapy biopsy L3439int |
| GSM825670 | 7.719641667 | GPL10295 | High-grade osteosarcoma pre-chemotherapy biopsy L3440int |
| GSM825671 | 8.228352703 | GPL10295 | High-grade osteosarcoma pre-chemotherapy biopsy L3441int |
| GSM825672 | 7.884265029 | GPL10295 | High-grade osteosarcoma pre-chemotherapy biopsy L3442int |
| GSM825673 | 7.455090659 | GPL10295 | High-grade osteosarcoma pre-chemotherapy biopsy L3443int |
| GSM825674 | 7.451993491 | GPL10295 | High-grade osteosarcoma pre-chemotherapy biopsy L3444int |
| GSM825675 | 7.825271907 | GPL10295 | High-grade osteosarcoma pre-chemotherapy biopsy L3445int |
| GSM825676 | 7.694037403 | GPL10295 | High-grade osteosarcoma pre-chemotherapy biopsy L3446int |
| GSM825677 | 7.932547169 | GPL10295 | High-grade osteosarcoma pre-chemotherapy biopsy L3447int |
| GSM825678 | 7.572328421 | GPL10295 | High-grade osteosarcoma pre-chemotherapy biopsy L3448int |
| GSM825679 | 7.775073075 | GPL10295 | High-grade osteosarcoma pre-chemotherapy biopsy L3449int |
| GSM825680 | 7.518057827 | GPL10295 | High-grade osteosarcoma pre-chemotherapy biopsy L3453int |
| GSM825681 | 8.509066314 | GPL10295 | High-grade osteosarcoma pre-chemotherapy biopsy L3454int |
| GSM825682 | 8.384951579 | GPL10295 | High-grade osteosarcoma pre-chemotherapy biopsy L3455int |
| GSM825683 | 7.664854604 | GPL10295 | High-grade osteosarcoma pre-chemotherapy biopsy L3456int |
| GSM825684 | 7.658304401 | GPL10295 | High-grade osteosarcoma pre-chemotherapy biopsy L3457int |
| GSM825685 | 8.199740597 | GPL10295 | High-grade osteosarcoma pre-chemotherapy biopsy L3458int |
| GSM825686 | 8.126999749 | GPL10295 | High-grade osteosarcoma pre-chemotherapy biopsy L3459int |
| GSM825687 | 7.815980625 | GPL10295 | High-grade osteosarcoma pre-chemotherapy biopsy L3460int |
| GSM825688 | 7.75354613  | GPL10295 | High-grade osteosarcoma pre-chemotherapy biopsy L3461int |
| GSM825689 | 7.693431656 | GPL10295 | High-grade osteosarcoma pre-chemotherapy biopsy L3462int |
| GSM825690 | 7.46242631  | GPL10295 | High-grade osteosarcoma pre-chemotherapy biopsy L3463int |
| GSM825691 | 7.524781455 | GPL10295 | High-grade osteosarcoma pre-chemotherapy biopsy L3464int |
| GSM825692 | 7.47429186  | GPL10295 | High-grade osteosarcoma pre-chemotherapy biopsy L3465int |
| GSM825693 | 8.005920303 | GPL10295 | High-grade osteosarcoma pre-chemotherapy biopsy L3466int |
| GSM825694 | 7.541821019 | GPL10295 | High-grade osteosarcoma pre-chemotherapy biopsy L3467int |
| GSM825695 | 7.695990247 | GPL10295 | High-grade osteosarcoma pre-chemotherapy biopsy L3468int |
| GSM825696 | 7.512463187 | GPL10295 | High-grade osteosarcoma pre-chemotherapy biopsy L3469int |
| GSM825697 | 8.394549948 | GPL10295 | High-grade osteosarcoma pre-chemotherapy biopsy L3470int |
| GSM825698 | 7.66405856  | GPL10295 | High-grade osteosarcoma pre-chemotherapy biopsy L3471int |

|           |             |          |                                                          |
|-----------|-------------|----------|----------------------------------------------------------|
| GSM825699 | 7.814480334 | GPL10295 | High-grade osteosarcoma pre-chemotherapy biopsy L3472int |
| GSM825700 | 7.790641822 | GPL10295 | High-grade osteosarcoma pre-chemotherapy biopsy L3473int |
| GSM825701 | 8.093862918 | GPL10295 | High-grade osteosarcoma pre-chemotherapy biopsy L3474int |
| GSM825702 | 7.909813219 | GPL10295 | High-grade osteosarcoma pre-chemotherapy biopsy L3475int |
| GSM825703 | 7.708466979 | GPL10295 | High-grade osteosarcoma pre-chemotherapy biopsy L3476int |
| GSM825704 | 7.586175091 | GPL10295 | High-grade osteosarcoma pre-chemotherapy biopsy L3477int |
| GSM825705 | 7.560483648 | GPL10295 | High-grade osteosarcoma pre-chemotherapy biopsy L3533int |
| GSM825706 | 7.55516275  | GPL10295 | High-grade osteosarcoma pre-chemotherapy biopsy L3534int |
| GSM825707 | 7.559983728 | GPL10295 | High-grade osteosarcoma pre-chemotherapy biopsy L3535int |
| GSM825708 | 7.534631221 | GPL10295 | High-grade osteosarcoma pre-chemotherapy biopsy L3536int |
| GSM825709 | 7.526734103 | GPL10295 | High-grade osteosarcoma pre-chemotherapy biopsy L3538int |
| GSM879156 | 7.461736841 | GPL16102 | Osteosarcoma                                             |
| GSM879157 | 7.380462031 | GPL16102 | Osteosarcoma                                             |
| GSM879158 | 7.631817073 | GPL16102 | Osteosarcoma                                             |
| GSM879159 | 8.512594874 | GPL16102 | Osteosarcoma                                             |
| GSM879160 | 8.233593506 | GPL16102 | Osteosarcoma                                             |
| GSM879161 | 7.822594228 | GPL16102 | Osteosarcoma                                             |
| GSM879162 | 7.796264772 | GPL16102 | Osteosarcoma                                             |
| GSM879163 | 7.648956683 | GPL16102 | Osteosarcoma                                             |
| GSM879164 | 8.285188598 | GPL16102 | Osteosarcoma                                             |
| GSM879165 | 7.564918903 | GPL16102 | Osteosarcoma                                             |
| GSM879166 | 7.725018186 | GPL16102 | Osteosarcoma                                             |
| GSM879167 | 7.747628437 | GPL16102 | Osteosarcoma                                             |
| GSM879168 | 8.185049552 | GPL16102 | Osteosarcoma                                             |
| GSM879169 | 7.842014145 | GPL16102 | Osteosarcoma                                             |
| GSM879170 | 7.466894813 | GPL16102 | Osteosarcoma                                             |
| GSM879171 | 7.997723804 | GPL16102 | Osteosarcoma                                             |
| GSM879172 | 7.953425141 | GPL16102 | Osteosarcoma                                             |
| GSM879173 | 7.787077109 | GPL16102 | Osteosarcoma                                             |
| GSM879174 | 7.305457269 | GPL16102 | Osteosarcoma                                             |
| GSM879175 | 8.076220323 | GPL16102 | Normal osteoblast                                        |
| GSM879176 | 7.486351517 | GPL16102 | Normal osteoblast                                        |
| GSM879177 | 7.886140529 | GPL16102 | Normal bone                                              |
| GSM879178 | 7.505849268 | GPL16102 | Normal bone                                              |
| GSM879179 | 7.603822943 | GPL16102 | Normal bone                                              |
| GSM879180 | 7.271502562 | GPL16102 | Normal bone                                              |
| GSM958993 | 7.838963471 | GPL96    | osteosarcoma                                             |
| GSM958994 | 9.981604524 | GPL96    | osteosarcoma                                             |
| GSM958995 | 9.382767187 | GPL96    | osteosarcoma                                             |
| GSM958996 | 10.06760511 | GPL96    | osteosarcoma                                             |
| GSM958997 | 8.323981014 | GPL96    | osteosarcoma                                             |
| GSM958998 | 7.890453846 | GPL96    | osteosarcoma                                             |
| GSM958999 | 7.918329479 | GPL96    | osteosarcoma                                             |
| GSM959000 | 7.479352879 | GPL96    | osteosarcoma                                             |
| GSM959001 | 8.694963716 | GPL96    | osteosarcoma                                             |
| GSM959002 | 8.240978755 | GPL96    | osteosarcoma                                             |

|           |             |          |                                                                |
|-----------|-------------|----------|----------------------------------------------------------------|
| GSM959039 | 7.740039744 | GPL96    | undifferentiated osteoblasts grown in proliferation medium     |
| GSM959040 | 7.958237534 | GPL96    | differentiated osteoblasts grown in differentiation medium     |
| GSM959043 | 7.834727986 | GPL96    | bone marrow-derived mesenchymal stem cells                     |
| GSM717846 | 7.725149434 | GPL10295 | Mesenchymal stem cell                                          |
| GSM717847 | 7.581945571 | GPL10295 | Mesenchymal stem cell                                          |
| GSM717848 | 7.70788472  | GPL10295 | Mesenchymal stem cell                                          |
| GSM717849 | 7.582494941 | GPL10295 | Mesenchymal stem cell                                          |
| GSM717850 | 7.610370658 | GPL10295 | Mesenchymal stem cell                                          |
| GSM717851 | 7.499490509 | GPL10295 | Mesenchymal stem cell                                          |
| GSM717852 | 7.475565305 | GPL10295 | Mesenchymal stem cell                                          |
| GSM717853 | 7.557016603 | GPL10295 | Mesenchymal stem cell                                          |
| GSM717854 | 7.56583806  | GPL10295 | Mesenchymal stem cell                                          |
| GSM717855 | 7.643666737 | GPL10295 | Mesenchymal stem cell                                          |
| GSM717856 | 7.581932934 | GPL10295 | Mesenchymal stem cell                                          |
| GSM717857 | 7.569726137 | GPL10295 | Mesenchymal stem cell                                          |
| GSM825623 | 8.035499018 | GPL10295 | Osteoblast                                                     |
| GSM825624 | 7.895234483 | GPL10295 | Osteoblast                                                     |
| GSM825625 | 7.754401898 | GPL10295 | Osteoblast                                                     |
| GSM825626 | 7.983967697 | GPL10295 | High-grade osteosarcoma pre-chemotherapy biopsy/tibia/fibula/F |
| GSM825627 | 7.704090315 | GPL10295 | High-grade osteosarcoma pre-chemotherapy biopsy/femur/F        |
| GSM825628 | 7.51312935  | GPL10295 | High-grade osteosarcoma pre-chemotherapy biopsy/tibia/fibula/F |
| GSM825629 | 8.107275821 | GPL10295 | High-grade osteosarcoma pre-chemotherapy biopsy/femur/F        |
| GSM825630 | 7.670882398 | GPL10295 | High-grade osteosarcoma pre-chemotherapy biopsy/tibia/fibula/M |
| GSM825631 | 7.553985172 | GPL10295 | High-grade osteosarcoma pre-chemotherapy biopsy/tibia/fibula/M |
| GSM825632 | 7.574400577 | GPL10295 | High-grade osteosarcoma pre-chemotherapy biopsy/tibia/fibula/M |
| GSM825633 | 7.661105847 | GPL10295 | High-grade osteosarcoma pre-chemotherapy biopsy/femur/M        |
| GSM825634 | 7.688257221 | GPL10295 | High-grade osteosarcoma pre-chemotherapy biopsy/femur/M        |
| GSM825635 | 7.496317287 | GPL10295 | High-grade osteosarcoma pre-chemotherapy biopsy/femur/M        |
| GSM825636 | 7.673973769 | GPL10295 | High-grade osteosarcoma pre-chemotherapy biopsy/femur/M        |
| GSM825637 | 7.797207625 | GPL10295 | High-grade osteosarcoma pre-chemotherapy biopsy/tibia/fibula/F |
| GSM825638 | 7.770380208 | GPL10295 | High-grade osteosarcoma pre-chemotherapy biopsy/femur/F        |
| GSM825639 | 7.640796799 | GPL10295 | High-grade osteosarcoma pre-chemotherapy biopsy/tibia/fibula/M |
| GSM825640 | 7.543910411 | GPL10295 | High-grade osteosarcoma pre-chemotherapy biopsy/humerus/M      |
| GSM825641 | 7.821689727 | GPL10295 | High-grade osteosarcoma pre-chemotherapy biopsy/femur/M        |
| GSM825642 | 7.636564422 | GPL10295 | High-grade osteosarcoma pre-chemotherapy biopsy/femur/M        |
| GSM825643 | 7.727378325 | GPL10295 | High-grade osteosarcoma pre-chemotherapy biopsy/femur/F        |
| GSM825644 | 7.728246934 | GPL10295 | High-grade osteosarcoma pre-chemotherapy biopsy/tibia/fibula/M |
| GSM825645 | 7.444334435 | GPL10295 | High-grade osteosarcoma pre-chemotherapy biopsy/femur/F        |
| GSM825646 | 7.452363696 | GPL10295 | High-grade osteosarcoma pre-chemotherapy biopsy/tibia/fibula/M |
| GSM825647 | 7.776465692 | GPL10295 | High-grade osteosarcoma pre-chemotherapy biopsy/tibia/fibula/F |
| GSM825648 | 7.497378261 | GPL10295 | High-grade osteosarcoma pre-chemotherapy biopsy/tibia/fibula/M |
| GSM825649 | 7.646537053 | GPL10295 | High-grade osteosarcoma pre-chemotherapy biopsy/humerus/F      |
| GSM825650 | 7.435562819 | GPL10295 | High-grade osteosarcoma pre-chemotherapy biopsy/femur/F        |
| GSM825651 | 7.709310064 | GPL10295 | High-grade osteosarcoma pre-chemotherapy biopsy/humerus/F      |
| GSM825652 | 7.481747729 | GPL10295 | High-grade osteosarcoma pre-chemotherapy biopsy/femur/F        |
| GSM825653 | 7.749049819 | GPL10295 | High-grade osteosarcoma pre-chemotherapy biopsy/tibia/fibula/M |

|           |             |          |                                                                |
|-----------|-------------|----------|----------------------------------------------------------------|
| GSM825654 | 7.436044038 | GPL10295 | High-grade osteosarcoma pre-chemotherapy biopsy/femur/M        |
| GSM825655 | 7.51551564  | GPL10295 | High-grade osteosarcoma pre-chemotherapy biopsy/tibia/fibula/M |
| GSM825656 | 7.474996    | GPL10295 | High-grade osteosarcoma pre-chemotherapy biopsy/tibia/fibula/M |
| GSM825657 | 7.755150022 | GPL10295 | High-grade osteosarcoma pre-chemotherapy biopsy/tibia/fibula/F |
| GSM825658 | 8.290514365 | GPL10295 | High-grade osteosarcoma pre-chemotherapy biopsy/femur/M        |
| GSM825659 | 7.651782812 | GPL10295 | High-grade osteosarcoma pre-chemotherapy biopsy/femur/F        |
| GSM825660 | 7.75385913  | GPL10295 | High-grade osteosarcoma pre-chemotherapy biopsy/femur/M        |
| GSM825661 | 7.452542567 | GPL10295 | High-grade osteosarcoma pre-chemotherapy biopsy/humerus/F      |
| GSM825662 | 7.571275516 | GPL10295 | High-grade osteosarcoma pre-chemotherapy biopsy/tibia/fibula/M |
| GSM825663 | 8.04425807  | GPL10295 | High-grade osteosarcoma pre-chemotherapy biopsy/femur/F        |
| GSM825664 | 7.593152519 | GPL10295 | High-grade osteosarcoma pre-chemotherapy biopsy/tibia/fibula/M |
| GSM825665 | 7.653432401 | GPL10295 | High-grade osteosarcoma pre-chemotherapy biopsy/femur/M        |
| GSM825666 | 7.553208301 | GPL10295 | High-grade osteosarcoma pre-chemotherapy biopsy/femur/M        |
| GSM825667 | 7.639727004 | GPL10295 | High-grade osteosarcoma pre-chemotherapy biopsy/femur/M        |
| GSM825668 | 7.546437303 | GPL10295 | High-grade osteosarcoma pre-chemotherapy biopsy/tibia/fibula/M |
| GSM825669 | 7.596407796 | GPL10295 | High-grade osteosarcoma pre-chemotherapy biopsy/humerus/M      |
| GSM825670 | 7.719641667 | GPL10295 | High-grade osteosarcoma pre-chemotherapy biopsy/femur/M        |
| GSM825671 | 8.228352703 | GPL10295 | High-grade osteosarcoma pre-chemotherapy biopsy/femur/M        |
| GSM825672 | 7.884265029 | GPL10295 | High-grade osteosarcoma pre-chemotherapy biopsy/femur/F        |
| GSM825673 | 7.455090659 | GPL10295 | High-grade osteosarcoma pre-chemotherapy biopsy/humerus/F      |
| GSM825674 | 7.451993491 | GPL10295 | High-grade osteosarcoma pre-chemotherapy biopsy/humerus/M      |
| GSM825675 | 7.825271907 | GPL10295 | High-grade osteosarcoma pre-chemotherapy biopsy/tibia/fibula/F |
| GSM825676 | 7.694037403 | GPL10295 | High-grade osteosarcoma pre-chemotherapy biopsy/femur/M        |
| GSM825677 | 7.932547169 | GPL10295 | High-grade osteosarcoma pre-chemotherapy biopsy/humerus/M      |
| GSM825678 | 7.572328421 | GPL10295 | High-grade osteosarcoma pre-chemotherapy biopsy/femur/M        |
| GSM825679 | 7.775073075 | GPL10295 | High-grade osteosarcoma pre-chemotherapy biopsy/femur/F        |
| GSM825680 | 7.518057827 | GPL10295 | High-grade osteosarcoma pre-chemotherapy biopsy/femur/M        |
| GSM825681 | 8.509066314 | GPL10295 | High-grade osteosarcoma pre-chemotherapy biopsy/other/M        |
| GSM825682 | 8.384951579 | GPL10295 | High-grade osteosarcoma pre-chemotherapy biopsy/tibia/fibula/M |
| GSM825683 | 7.664854604 | GPL10295 | High-grade osteosarcoma pre-chemotherapy biopsy/tibia/fibula/M |
| GSM825684 | 7.658304401 | GPL10295 | High-grade osteosarcoma pre-chemotherapy biopsy/humerus/F      |
| GSM825685 | 8.199740597 | GPL10295 | High-grade osteosarcoma pre-chemotherapy biopsy/femur/M        |
| GSM825686 | 8.126999749 | GPL10295 | High-grade osteosarcoma pre-chemotherapy biopsy/tibia/fibula/F |
| GSM825687 | 7.815980625 | GPL10295 | High-grade osteosarcoma pre-chemotherapy biopsy/tibia/fibula/M |
| GSM825688 | 7.75354613  | GPL10295 | High-grade osteosarcoma pre-chemotherapy biopsy/femur/M        |
| GSM825689 | 7.693431656 | GPL10295 | High-grade osteosarcoma pre-chemotherapy biopsy/tibia/fibula/M |
| GSM825690 | 7.46242631  | GPL10295 | High-grade osteosarcoma pre-chemotherapy biopsy/humerus/M      |
| GSM825691 | 7.524781455 | GPL10295 | High-grade osteosarcoma pre-chemotherapy biopsy/tibia/fibula/M |
| GSM825692 | 7.47429186  | GPL10295 | High-grade osteosarcoma pre-chemotherapy biopsy/femur/F        |
| GSM825693 | 8.005920303 | GPL10295 | High-grade osteosarcoma pre-chemotherapy biopsy/femur/F        |
| GSM825694 | 7.541821019 | GPL10295 | High-grade osteosarcoma pre-chemotherapy biopsy/femur/M        |
| GSM825695 | 7.695990247 | GPL10295 | High-grade osteosarcoma pre-chemotherapy biopsy/other/M        |
| GSM825696 | 7.512463187 | GPL10295 | High-grade osteosarcoma pre-chemotherapy biopsy/femur/M        |
| GSM825697 | 8.394549948 | GPL10295 | High-grade osteosarcoma pre-chemotherapy biopsy/unknown/F      |
| GSM825698 | 7.66405856  | GPL10295 | High-grade osteosarcoma pre-chemotherapy biopsy/axial/F        |
| GSM825699 | 7.814480334 | GPL10295 | High-grade osteosarcoma pre-chemotherapy biopsy/femur/M        |



|            |             |          |                                                                |
|------------|-------------|----------|----------------------------------------------------------------|
| GSM825700  | 7.790641822 | GPL10295 | High-grade osteosarcoma pre-chemotherapy biopsy/tibia/fibula/M |
| GSM825701  | 8.093862918 | GPL10295 | High-grade osteosarcoma pre-chemotherapy biopsy/humerus/M      |
| GSM825702  | 7.909813219 | GPL10295 | High-grade osteosarcoma pre-chemotherapy biopsy/femur/M        |
| GSM825703  | 7.708466979 | GPL10295 | High-grade osteosarcoma pre-chemotherapy biopsy/tibia/fibula/M |
| GSM825704  | 7.586175091 | GPL10295 | High-grade osteosarcoma pre-chemotherapy biopsy/femur/M        |
| GSM825705  | 7.560483648 | GPL10295 | High-grade osteosarcoma pre-chemotherapy biopsy/femur/M        |
| GSM825706  | 7.55516275  | GPL10295 | High-grade osteosarcoma pre-chemotherapy biopsy/femur/F        |
| GSM825707  | 7.559983728 | GPL10295 | High-grade osteosarcoma pre-chemotherapy biopsy/tibia/fibula/M |
| GSM825708  | 7.534631221 | GPL10295 | High-grade osteosarcoma pre-chemotherapy biopsy/femur/M        |
| GSM825709  | 7.526734103 | GPL10295 | High-grade osteosarcoma pre-chemotherapy biopsy                |
| GSM1038236 | 7.56699047  | GPL10295 | High-grade osteosarcoma cell line                              |
| GSM1038237 | 7.697653745 | GPL10295 | High-grade osteosarcoma cell line                              |
| GSM1038238 | 7.806908137 | GPL10295 | High-grade osteosarcoma cell line                              |
| GSM1038239 | 8.256594883 | GPL10295 | High-grade osteosarcoma cell line                              |
| GSM1038240 | 8.232304927 | GPL10295 | High-grade osteosarcoma cell line                              |
| GSM1038241 | 7.869700887 | GPL10295 | High-grade osteosarcoma cell line                              |
| GSM1038242 | 7.838225185 | GPL10295 | High-grade osteosarcoma cell line                              |
| GSM1038243 | 7.722003822 | GPL10295 | High-grade osteosarcoma cell line                              |
| GSM1038244 | 8.471365154 | GPL10295 | High-grade osteosarcoma cell line                              |
| GSM1038245 | 7.64943764  | GPL10295 | High-grade osteosarcoma cell line                              |
| GSM1038246 | 7.795922097 | GPL10295 | High-grade osteosarcoma cell line                              |
| GSM1038247 | 8.184228145 | GPL10295 | High-grade osteosarcoma cell line                              |
| GSM1038248 | 7.886640446 | GPL10295 | High-grade osteosarcoma cell line                              |
| GSM1038249 | 7.573491856 | GPL10295 | High-grade osteosarcoma cell line                              |
| GSM1038250 | 7.50279617  | GPL10295 | High-grade osteosarcoma cell line                              |
| GSM1038251 | 8.00770881  | GPL10295 | High-grade osteosarcoma cell line                              |
| GSM1038252 | 7.98214656  | GPL10295 | High-grade osteosarcoma cell line                              |
| GSM1038253 | 7.837193609 | GPL10295 | High-grade osteosarcoma cell line                              |
| GSM1038254 | 7.44188723  | GPL10295 | High-grade osteosarcoma cell line                              |
| GSM1192008 | 7.363715    | GPL6947  | 1:METASTATIC=yes                                               |
| GSM1192009 | 7.24369     | GPL6947  | 2:METASTATIC=yes                                               |
| GSM1192010 | 7.33975     | GPL6947  | 3:METASTATIC=yes                                               |
| GSM1192011 | 7.329625    | GPL6947  | 4:METASTATIC=yes                                               |
| GSM1192012 | 7.304785    | GPL6947  | 5:METASTATIC=yes                                               |
| GSM1192013 | 7.31283     | GPL6947  | 6:METASTATIC=yes                                               |
| GSM1192014 | 7.314025    | GPL6947  | 7:METASTATIC=no                                                |
| GSM1192015 | 7.3297      | GPL6947  | 8:METASTATIC=no                                                |
| GSM1192016 | 7.36553     | GPL6947  | 9:METASTATIC=no                                                |
| GSM1192017 | 7.2846      | GPL6947  | 10:METASTATIC=no                                               |
| GSM1192018 | 7.32781     | GPL6947  | 11:METASTATIC=no                                               |
| GSM1192019 | 7.320385    | GPL6947  | 12:METASTATIC=no                                               |
| GSM1676300 | 8.8616194   | GPL11028 | Osteosarcoma                                                   |
| GSM1676303 | 8.016198492 | GPL11028 | Osteosarcoma                                                   |
| GSM1676308 | 5.671001444 | GPL11028 | Osteosarcoma                                                   |
| GSM1676314 | 7.900893518 | GPL11028 | Osteosarcoma                                                   |
| GSM1676316 | 8.475353647 | GPL11028 | Osteosarcoma                                                   |

|            |             |          |                                    |
|------------|-------------|----------|------------------------------------|
| GSM1676324 | 7.62162095  | GPL11028 | Osteosarcoma                       |
| GSM1676341 | 7.736751456 | GPL11028 | Osteosarcoma                       |
| GSM1676345 | 8.500601764 | GPL11028 | Normal human mesenchymal stem cell |
| GSM1676346 | 6.861644672 | GPL11028 | Normal human chondrocyte           |
| GSM1676347 | 7.516560519 | GPL11028 | Normal human osteoblast            |
| GSM1676348 | 8.73656388  | GPL11028 | Normal human skeletal muscle       |
| GSM1676349 | 6.932180802 | GPL11028 | Osteosarcoma                       |
| GSM1676352 | 8.328760212 | GPL11028 | Osteosarcoma                       |
| GSM1676359 | 8.543522364 | GPL11028 | Osteosarcoma                       |
| GSM2276632 | 9.2443285   | GPL570   | Bone primary cells                 |
| GSM2276633 | 9.225092    | GPL570   | Bone primary cells                 |
| GSM2276634 | 8.155055    | GPL570   | Bone primary cells                 |
| GSM2276635 | 5.8218265   | GPL570   | Lung metastasis cells              |
| GSM2276636 | 6.988139    | GPL570   | Lung metastasis cells              |
| GSM2276637 | 8.191608    | GPL570   | Lung metastasis cells              |
| GSM2335686 | 33.9608     | GPL11154 | tumor type: metastasis             |
| GSM2335687 | 6.68349     | GPL11154 | tumor type: primary                |
| GSM2335688 | 12.5737     | GPL11154 | tumor type: primary                |
| GSM2335689 | 17.2254     | GPL11154 | tumor type: primary                |
| GSM2335690 | 2.71915     | GPL11154 | tumor type: primary                |
| GSM2335691 | 5.4131      | GPL11154 | tumor type: primary                |
| GSM2335692 | 4.08658     | GPL11154 | tumor type: primary                |
| GSM2335693 | 10.271      | GPL11154 | tumor type: primary                |
| GSM2335694 | 6.33505     | GPL11154 | tumor type: primary                |
| GSM2335695 | 1.47133     | GPL11154 | tumor type: primary                |
| GSM2335696 | 7.59695     | GPL11154 | tumor type: primary                |
| GSM2335700 | 11.0041     | GPL11154 | tumor type: primary                |
| GSM2335701 | 10.4041     | GPL11154 | tumor type: primary                |
| GSM2335702 | 11.5934     | GPL11154 | tumor type: primary                |
| GSM2335703 | 6.34012     | GPL11154 | tumor type: primary                |
| GSM2335704 | 5.19214     | GPL11154 | tumor type: primary                |
| GSM2335705 | 7.24554     | GPL11154 | tumor type: primary                |
| GSM2335706 | 2.74129     | GPL11154 | tumor type: primary                |
| GSM2335707 | 3.65726     | GPL11154 | tumor type: primary                |
| GSM2335712 | 2.53269     | GPL11154 | tumor type: metastasis             |
| GSM2335713 | 3.68722     | GPL11154 | tumor type: metastasis             |
| GSM2335714 | 23.1899     | GPL11154 | tumor type: primary                |
| GSM2335715 | 14.307      | GPL11154 | tumor type: metastasis             |
| GSM2335716 | 11.7376     | GPL11154 | tumor type: metastasis             |
| GSM2335717 | 21.1156     | GPL11154 | tumor type: metastasis             |
| GSM2335718 | 6.33892     | GPL11154 | tumor type: metastasis             |
| GSM2335719 | 30.6418     | GPL11154 | tumor type: metastasis             |
| GSM2335720 | 12.8956     | GPL11154 | tumor type: primary                |
| GSM2335721 | 10.9024     | GPL11154 | tumor type: metastasis             |
| GSM2335722 | 18.3368     | GPL11154 | tumor type: primary                |
| GSM2335723 | 7.25944     | GPL11154 | tumor type: primary                |

|                      |             |          |                                                |
|----------------------|-------------|----------|------------------------------------------------|
| GSM2335724           | 4.39789     | GPL11154 | tumor type: primary                            |
| GSM2335725           | 4.95524     | GPL11154 | tumor type: primary                            |
| GSM2335730           | 7.97358     | GPL11154 | tumor type: normal bone                        |
| GSM2335731           | 5.91784     | GPL11154 | tumor type: normal bone                        |
| GSM2335732           | 0.195058    | GPL11154 | tumor type: normal bone                        |
| GSM3593746           | 6.657607037 | GPL20301 | tissue: tumor/gender: female/age: 15           |
| GSM3593747           | 5.969065562 | GPL20301 | tissue: tumor/gender: male/age: 46             |
| GSM3593748           | 5.721689388 | GPL20301 | tissue: adjacent normal/gender: male/age: 46   |
| GSM3593750           | 4.790231634 | GPL20301 | tissue: adjacent normal/gender: male/age: 22   |
| GSM3593752           | 4.199197701 | GPL20301 | tissue: adjacent normal/gender: male/age: 10   |
| GSM3593754           | 1.684204459 | GPL20301 | tissue: adjacent normal/gender: female/age: 10 |
| GSM4272756           | 5.234217331 | GPL20301 | tissue: normal/gender: male/age: 53            |
| GSM4272757           | 4.187475304 | GPL20301 | tissue: tumor/gender: male/age: 53             |
| GSM4272758           | 6.659889498 | GPL20301 | tissue: normal/gender: male/age: 39            |
| GSM4272759           | 4.013581391 | GPL20301 | tissue: tumor/gender: male/age: 39             |
| GSM4272760           | 6.112390755 | GPL20301 | tissue: normal/gender: male/age: 15            |
| GSM4272762           | 5.325062893 | GPL20301 | tissue: normal/gender: male/age: 15            |
| GSM4955769           | 3.333445923 | GPL20301 | tissue: normal/gender: female/age: 5           |
| GSM4955771           | 3.072885541 | GPL20301 | tissue: normal/gender: male/age: 45            |
| TARGET.40.PASUUH.01A | 0.861637817 | None     | Non-metastatic (confirmed)                     |
| TARGET.40.PAUTWB.01A | 2.654298047 | None     | Non-metastatic (confirmed)                     |
| TARGET.40.PAKUZU.01A | 1.841127778 | None     | Non-metastatic (confirmed)                     |
| TARGET.40.PARJXU.01A | 4.022465469 | None     | Metastatic (confirmed)                         |
| TARGET.40.PAPWWC.01A | 1.507211103 | None     | Non-metastatic (confirmed)                     |
| TARGET.40.PAUUML.01A | 0.686522938 | None     | Non-metastatic (confirmed)                     |
| TARGET.40.PAMHLF.01A | 2.31089266  | None     | Non-metastatic (confirmed)                     |
| TARGET.40.PAUBIT.01A | 3.118525849 | None     | Non-metastatic (confirmed)                     |
| TARGET.40.PASFCV.01A | 1.256889886 | None     | Non-metastatic (confirmed)                     |
| TARGET.40.PARDAX.01A | 0.473838853 | None     | Metastatic (confirmed)                         |
| TARGET.40.OA4I4O.01A | 2.243364426 | None     | Non-metastatic (confirmed)                     |
| TARGET.40.OA4I48.01A | 2.59724511  | None     | Metastatic                                     |
| TARGET.40.PASEFS.01A | 3.949039943 | None     | Non-metastatic (confirmed)                     |
| TARGET.40.PARKAF.01A | 1.716595882 | None     | Non-metastatic (confirmed)                     |
| TARGET.40.PATUXZ.01A | 1.468270504 | None     | Metastatic (confirmed)                         |
| TARGET.40.PAMHYN.01A | 3.030177144 | None     | Non-metastatic (confirmed)                     |
| TARGET.40.PASEBY.01A | 2.703676599 | None     | Non-metastatic (confirmed)                     |
| TARGET.40.PANMIG.01A | 3.473046545 | None     | Metastatic                                     |
| TARGET.40.PAKFVX.01A | 0.60757888  | None     | Non-metastatic (confirmed)                     |
| TARGET.40.PASNZV.01A | 0.409255147 | None     | Non-metastatic (confirmed)                     |
| TARGET.40.OA4I4M.01A | 1.273873908 | None     | Non-metastatic (confirmed)                     |
| TARGET.40.PAMYYJ.01A | 0.544386466 | None     | Metastatic                                     |
| TARGET.40.PAVECB.01A | 3.333423734 | None     | Non-metastatic (confirmed)                     |
| TARGET.40.OA4I42.01A | 1.492673596 | None     | Non-metastatic (confirmed)                     |
| TARGET.40.PASYUK.01A | 1.999386724 | None     | Non-metastatic (confirmed)                     |
| TARGET.40.PALECC.01A | 2.215740713 | None     | Non-metastatic (confirmed)                     |
| TARGET.40.PAMLKS.01A | 0.214497868 | None     | Metastatic                                     |

|                      |             |      |                            |
|----------------------|-------------|------|----------------------------|
| TARGET.40.PANSEN.01A | 3.379080266 | None | Non-metastatic (confirmed) |
| TARGET.40.PALHRL.01A | 2.411995618 | None | Metastatic                 |
| TARGET.40.PANZHX.01A | 1.329869872 | None | Metastatic                 |
| TARGET.40.PALKDP.01A | 2.074197135 | None | Non-metastatic (confirmed) |
| TARGET.40.0A4I65.01A | 1.854235079 | None | Non-metastatic (Confirmed) |
| TARGET.40.0A4I6O.01A | 3.415014957 | None | Non-metastatic (confirmed) |
| TARGET.40.PALFYN.01A | 2.192572941 | None | Non-metastatic (confirmed) |
| TARGET.40.PATPBS.01A | 1.47990311  | None | Non-metastatic (confirmed) |
| TARGET.40.PAPXGT.01A | 3.222989986 | None | Non-metastatic (confirmed) |
| TARGET.40.0A4I4E.01A | 2.077687363 | None | Metastatic                 |
| TARGET.40.0A4HLD.01A | 3.687799768 | None | Non-metastatic (confirmed) |
| TARGET.40.PAUYTT.01A | 3.002990491 | None | Non-metastatic (confirmed) |
| TARGET.40.0A4I0W.01A | 1.927934369 | None | Non-metastatic (confirmed) |
| TARGET.40.PARFTG.01A | 1.930964367 | None | Non-metastatic (confirmed) |
| TARGET.40.0A4HX8.01A | 3.374037888 | None | Non-metastatic (confirmed) |
| TARGET.40.PAUTYB.01A | 1.185866545 | None | Non-metastatic (confirmed) |
| TARGET.40.PATMXR.01A | 1.640343282 | None | Metastatic                 |
| TARGET.40.PAPKWD.01A | 1.47134356  | None | Non-metastatic (confirmed) |
| TARGET.40.PAPNVD.01A | 2.719424417 | None | Non-metastatic (confirmed) |
| TARGET.40.PATMPU.01A | 2.468531186 | None | Non-metastatic (confirmed) |
| TARGET.40.PAPFLB.01A | 2.668799909 | None | Non-metastatic (confirmed) |
| TARGET.40.PAPIJR.01A | 2.165526097 | None | Non-metastatic (confirmed) |
| TARGET.40.PAMEKS.01A | 1.447684981 | None | Metastatic                 |
| TARGET.40.PAVDTY.01A | 0.53216732  | None | Non-metastatic (confirmed) |
| TARGET.40.PANGPE.01A | 2.884832328 | None | Non-metastatic (confirmed) |
| TARGET.40.PAMJXS.01A | 2.31533436  | None | Non-metastatic (confirmed) |
| TARGET.40.PAKZZK.01A | 3.208080202 | None | Non-metastatic (confirmed) |
| TARGET.40.PALWWX.01A | 1.064537998 | None | Metastatic                 |
| TARGET.40.PASKZZ.01A | 2.426452628 | None | Non-metastatic (confirmed) |
| TARGET.40.0A4HXS.01A | 2.562523303 | None | Non-metastatic (confirmed) |
| TARGET.40.PATEEM.01A | 4.509809834 | None | Non-metastatic (confirmed) |
| TARGET.40.0A4I0Q.01A | 2.658645654 | None | Metastatic                 |
| TARGET.40.PALKGN.01A | 2.118193584 | None | Non-metastatic (confirmed) |
| TARGET.40.PASRNE.01A | 0.392207499 | None | Non-metastatic (confirmed) |
| TARGET.40.PARGTM.01A | 3.393210243 | None | Non-metastatic (confirmed) |
| TARGET.40.PAUVUL.01A | 1.088548697 | None | Metastatic (confirmed)     |
| TARGET.40.PANGRW.01A | 1.050188223 | None | Non-metastatic (confirmed) |
| TARGET.40.PAVCLP.01A | 2.895263839 | None | Non-metastatic (confirmed) |
| TARGET.40.PATAWV.01A | 0.843983844 | None | Non-metastatic (confirmed) |
| TARGET.40.PARBGW.01A | 1.422448312 | None | Metastatic (confirmed)     |
| TARGET.40.PANXSC.01A | 2.408983529 | None | Non-metastatic (confirmed) |
| TARGET.40.0A4HMC.01A | 3.435428576 | None | Non-metastatic (confirmed) |
| TARGET.40.PAUXPZ.01A | 2.307632528 | None | Metastatic (confirmed)     |
| TARGET.40.PATJVI.01A | 0.027012465 | None | Metastatic (confirmed)     |
| TARGET.40.PAMRHD.01A | 2.766722359 | None | Metastatic                 |
| TARGET.40.PALZGU.01A | 2.365384595 | None | Non-metastatic (confirmed) |

|                      |             |      |                            |
|----------------------|-------------|------|----------------------------|
| TARGET.40.PANZZJ.01A | 2.037206487 | None | Non-metastatic (confirmed) |
| TARGET.40.PATKSS.01A | 3.543607236 | None | Non-metastatic (confirmed) |
| TARGET.40.PATMIF.01A | 2.63501138  | None | Non-metastatic (confirmed) |
| TARGET.40.PANPUM.01A | 3.136174977 | None | Metastatic                 |
| TARGET.40.PAKXLD.01A | 3.653862565 | None | Non-metastatic (confirmed) |
| TARGET.40.PASSLM.01A | 1.899252985 | None | Metastatic (confirmed)     |
| TARGET.40.PAMTCM.01A | 1.848117126 | None | Non-metastatic (confirmed) |
| TARGET.40.OA4HY5.01A | 1.677846466 | None | Metastatic                 |
| TARGET.40.PAVALD.01A | 2.646508309 | None | Non-metastatic (confirmed) |
| TARGET.40.OA4I8U.01A | 2.925600724 | None | Non-metastatic (confirmed) |
| TARGET.40.OA4I9K.01A | 2.942064033 | None | Non-metastatic (Confirmed) |
| TARGET.40.OA4I3S.01A | 0.852078763 | None | Non-metastatic (confirmed) |
| TARGET.40.PANVJJ.01A | 2.001730196 | None | Non-metastatic (confirmed) |
| TARGET.40.OA4I5B.01A | 2.667051917 | None | Non-metastatic (confirmed) |

## Supplementary table2: the 2D structure and PK/PD parameters of Exisulind.

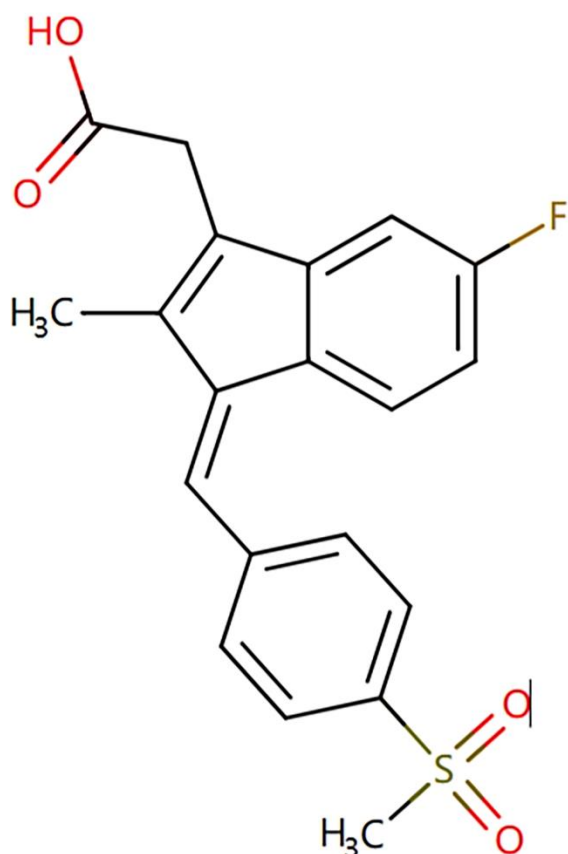

### Exisulind:

#### Pharmacokinetics:

Orally administered doses from 50 to 400 mg of Exisulind are rapidly absorbed in normal healthy volunteers. The maximum concentration ( $C_{max}$ ), time to  $C_{max}$  ( $T_{max}$ ), and area under the concentration curve (AUC) are 10.7 ug/ml, 2.3 h and 125 ug/h/ml, respectively for patients receiving 200 mg twice-daily. The half-life is 9-14 h. The plasma concentrations showed multiple peaks suggesting enterohepatic recirculation. The  $T_{max}$  and  $C_{max}$  are increased when the medication was taken with food; however, the AUCs are bioequivalent in the fed and fasting states. Exisulind is largely excreted unchanged in

the bile and appears to exert no effect on the cytochrome P450 enzymes [1].

#### Pharmacodynamics:

Exisulind has been shown to inhibit growth and induce apoptosis in several types of solid tumor cells including colon, prostate, bladder, breast, lung, cervical and hepatic with minimal or no effect on normal cells. In addition, Exisulind and its analogues inhibited leukemia and myeloma cell lines. In terms of mechanism of action, Exisulind inhibits cGMP PDE thereby increasing cellular levels of cGMP and activating protein kinase G (PKG). In proliferating HT-29 cells, Exisulind blocked G1 cell cycle progression but also induced apoptosis. Exisulind did not affect cell cycle progression in non-proliferating cells but did inhibit cell growth and induced apoptosis. Taken together, Exisulind causes growth inhibition and apoptosis under conditions where cell cycle arrest does not occur [2].

1. Webster WS, Leibovich BC. Exisulind in the treatment of prostate cancer. *Expert Rev Anticancer Ther.* 2005; 5: 957-62.
2. Goluboff ET. Exisulind, a selective apoptotic antineoplastic drug. *Expert Opin Investig Drugs.* 2001; 10: 1875-82.

### Supplementary table 3 : the 2D structure and PK/PD parameters of Tacrolimus.

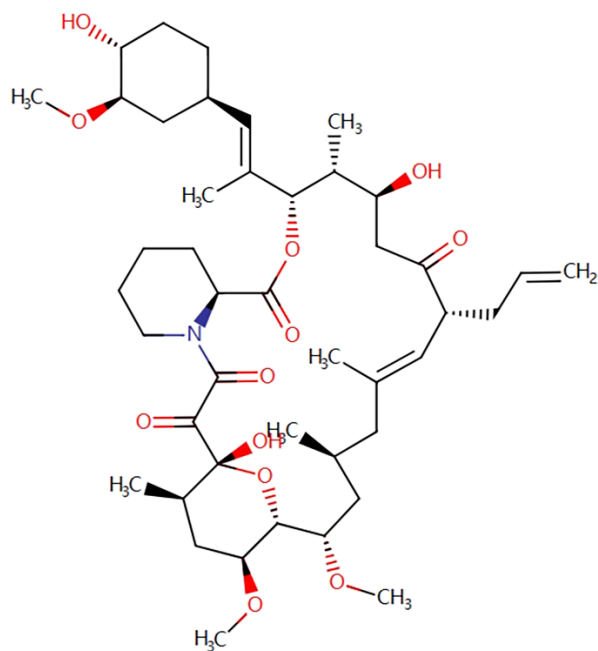

#### Tacrolimus (FK-506):

##### Pharmacokinetics:

The pharmacokinetics of FK-506 are variable among patients, and the absorption of the drug after oral administration is variable and incomplete. This indicates the need for monitoring the plasma concentrations of FK-506 in patients to avoid potential rejection of the transplanted organ. Since the distribution of FK-506 in blood is temperature-dependent, plasma must be separated at carefully controlled temperatures. In the preliminary observations, the trough

concentrations of FK-506 range from <0.1 ng/ml to nearly 5 ng/ml after an oral dose of 0.15 mg/kg/d. There is no specific side effect associated with higher trough concentrations [1].

##### Pharmacodynamics:

Tacrolimus acts by reducing peptidyl-prolyl isomerase activity by binding to the immunophilin FKBP-12 (FK506 binding protein) creating a new complex. This inhibits both T-lymphocyte signal transduction and IL-2 transcription. Tacrolimus has similar activity to cyclosporine but rates of rejection are lower with tacrolimus. Tacrolimus has also been shown to be effective in the topical treatment of eczema, particularly atopic eczema. It suppresses inflammation in a similar way to steroids, but is not as powerful. An important dermatological advantage of tacrolimus is that it can be used directly on the face; topical steroids cannot be used on the face, as they thin the skin dramatically there. On other parts of the body, topical steroid are generally a better treatment [<https://go.drugbank.com/drugs/DB00864>].

1. Venkataramanan R, Jain A, Cadoff E, Warty V, Iwasaki K, Nagase K, et al. Pharmacokinetics of FK 506: preclinical and clinical studies. *Transplant Proc.* 1990; 22: 52-6.
